# Supplementary material for: A highly sensitive aptamer method for Ag+sensing using resonance Rayleigh scattering as the detection technique and a modified nanogold probe
Source: Royal Society of Chemistry journal article supplement (doi:10.1039/c2ra22542e), 2012-12-04
Supplement: c2ra22542e.pdf [file c2ra22542e.pdf]

## A highly sensitive aptamer method for Ag<sup>+</sup> using resonance Rayleigh scattering as detection technique and the modified-nanogold as probe

Guiqing Wen<sup>a</sup>, Chenyin Lin<sup>a</sup>, Meilin Tang<sup>a</sup>, Gaosha Liu<sup>a</sup>, Aihui Liang<sup>a\*</sup>, and Zhiliang Jiang<sup>a\*</sup>

Table 1S Comparison of some analytical methods for Ag

| Method                                                         | Linear range  | Detection limit | Reference   |
|----------------------------------------------------------------|---------------|-----------------|-------------|
| Fluorescence                                                   | 50-70nM       | 32nM            | 15          |
| Surface plasmon resonance                                      | 50-2000nM     | 10nM            | 19          |
| RRS                                                            | 41.7-37000nM  | 12.7 nM         | 23          |
| Fluorescence                                                   | 10-700 nM     | 3.5 nM          | 26          |
| Localized surface plasmon resonance<br>light-scattering sensor | 0.13-1.12 mM  | 62nM            | 27          |
| RRS                                                            | 66.7-1333.3nM | 58.5 nM         | This method |
| Nanocatalytic RRS                                              | 3.3-666.7nM   | 3.1 nM          | This method |
